# Supplementary material for: Upper/Lower Respiratory Tract Microbiome Changes in AECOPD and COPD
Source: Research Square preprint supplement (doi:10.21203/rs.3.rs-139979/v1), 2021-01-07
Supplement: Supplementary file 2 [file dcf43f73b3240ba7b6818d09.xlsx]

## Sheet: Sheet1
Supplementary Table 6: The COPD group of the identical and unique bacteria in the upper and lower respiratory tract.
Names	total	elements
COPD_SputumCOPD_Swab	18	OTU-105 OTU-108 OTU-1000 OTU-505 OTU-1126 OTU-1124 OTU-662 OTU-661 OTU-162 OTU-663 OTU-510 OTU-49 OTU-191 OTU-189 OTU-548 OTU-1002 OTU-1001 OTU-543
COPD_Swab	7	OTU-1073 OTU-602 OTU-752 OTU-594 OTU-258 OTU-657 OTU-1068
COPD_Sputum	7	OTU-625 OTU-669 OTU-194 OTU-50 OTU-516 OTU-1174 OTU-640
